# Supplementary material for: Pressure Mapping Mat for Tele-Home Care Applications
Source: MDPI journal article supplement (doi:10.3390/s16030365), 2016-03-11
Supplement: s1 [file s1]

# Supplementary Materials: Pressure Mapping Mat for Tele-Home Care Applications

Jose Francisco Saenz-Cogollo, Massimiliano Pau, Beatrice Fraboni and Annalisa Bonfiglio

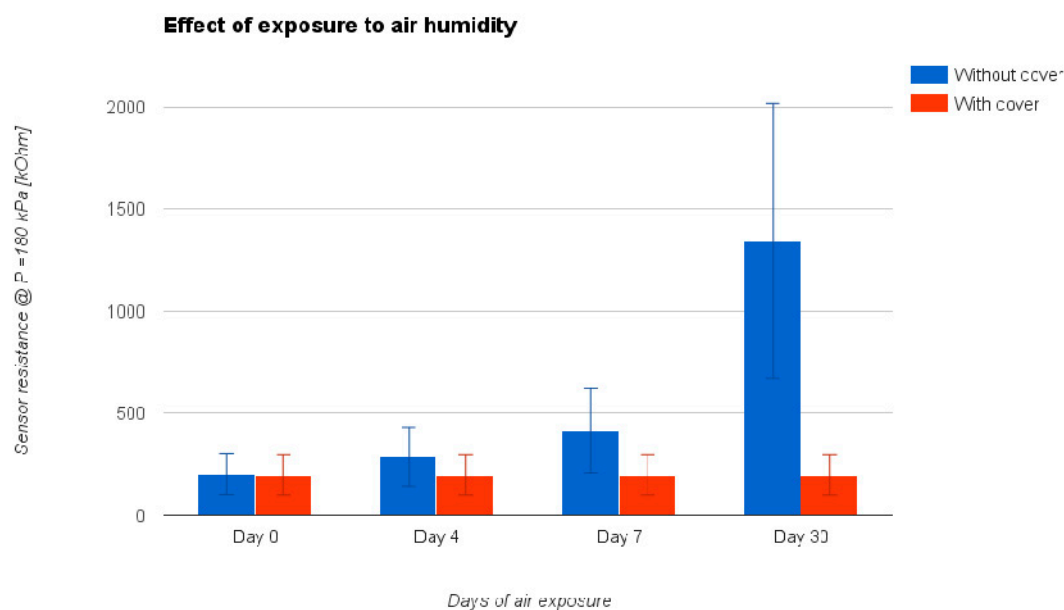

Figure S1. Effect of exposure to air humidity.

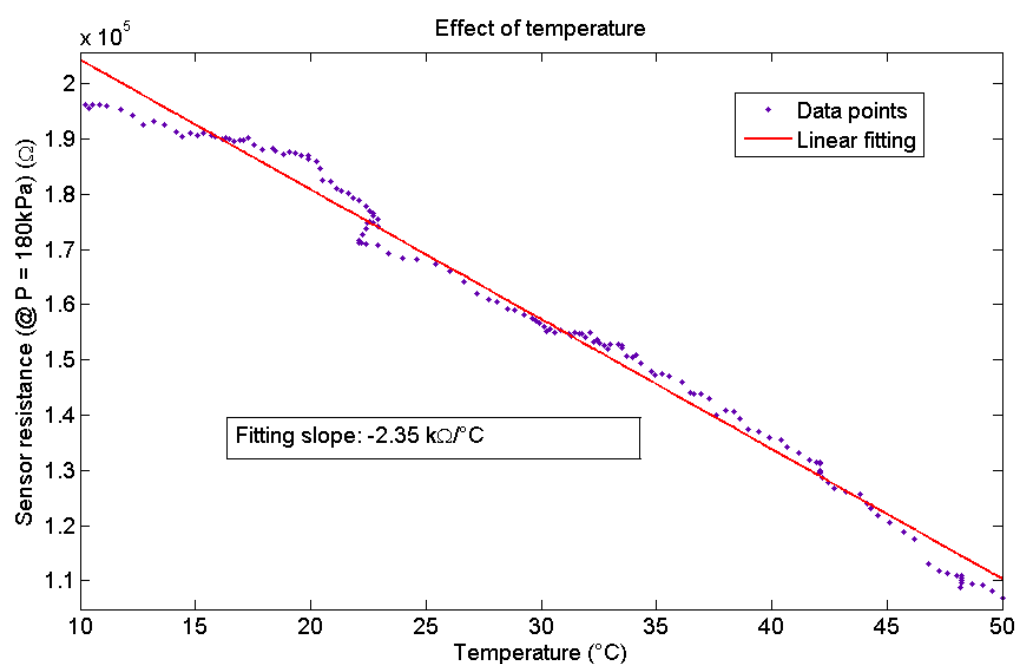

Figure S2. Effect of temperature while applying a constant pressure.
